# Supplementary material for: MxB binds to the HIV-1 core and prevents the uncoating process of HIV-1
Source: PubMed Central journal article supplement (PMC4145229; doi:10.1186/s12977-014-0068-x), 2014-08-14

**Additional file 1. Restriction of HIV-1 and other viruses by MxB.**

**(A)** HeLa cells stably expressing MxB (bottom panel) were challenged using increasing amounts of HIV-1-GFP. Forty-eight hours post-infection the percentage of GFP-positive cells was determined by flow cytometry. As a control, HeLa cells stably transduced with the empty vector LPCX were challenged with HIV-1. Similar results were obtained in three independent experiments and a representative experiment is shown. **(B)** U937 cells stably expressing MxB (bottom panel) were challenged with HIV-1-GFP and SIV<sub>mac</sub>-GFP. Forty-eight hours post-infection the percentage of GFP-positive cells was determined by flow cytometry. As a control, U937 cells stably transduced with the empty vector LPCX were challenged with HIV-1-GFP. Similar results were obtained in three independent experiments and a representative experiment is shown. **(C)** Cf2Th cells stably expressing MxB (bottom panel) were challenged with HIV-1-GFP, HIV-2-GFP, SIV<sub>mac</sub>-GFP, BIV-GFP, FIV-GFP, EAIV-GFP, N-MLV-GFP and B-MLV-GFP. Forty-eight hours post-infection the percentage of GFP-positive cells was determined by flow cytometry. As a control, Cf2Th cells stably transduced with the empty vector LPCX were challenged with the indicated viruses. Similar results were obtained in three independent experiments and a representative experiment is shown. **(D)** The ability of MxB to bind in vitro assembled SIV<sub>mac</sub> (left panel) or HIV-2 (right panel) CA-NC complexes was measured, as described in experimental procedures. Bound fractions were analyzed using anti-HA, anti-p27 and anti-HIV-2-p24 antibodies. Similar results were obtained in three independent experiments and a representative experiment is shown.

# A

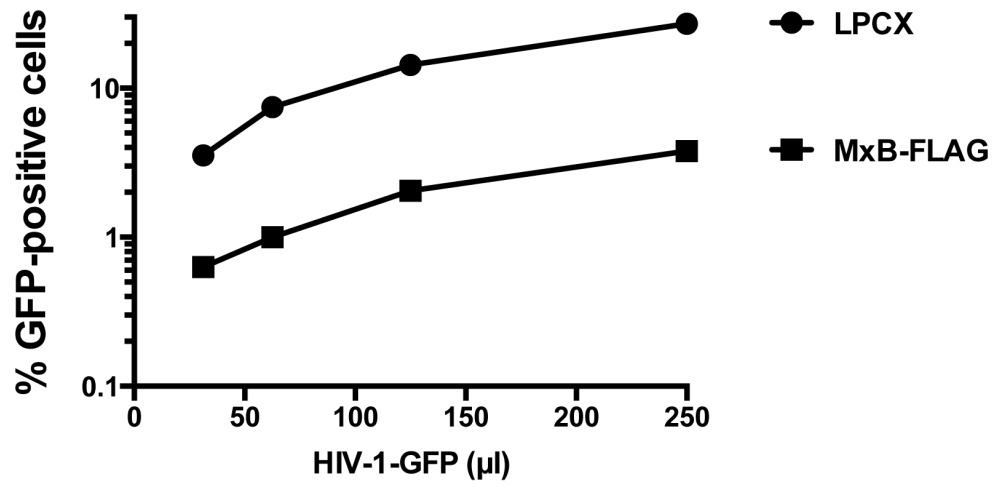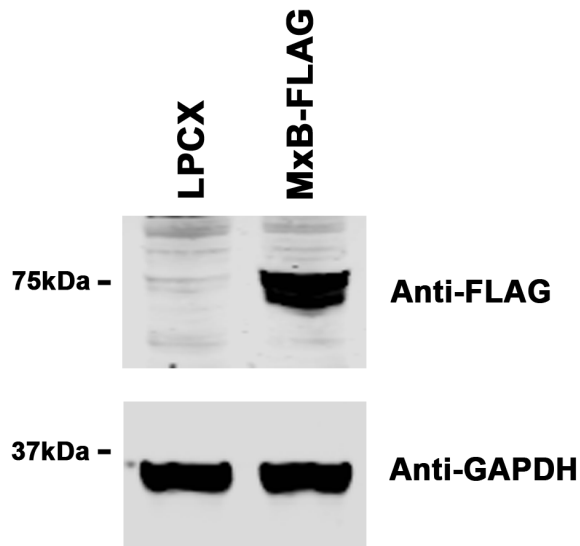

**Additional file 1**

# B

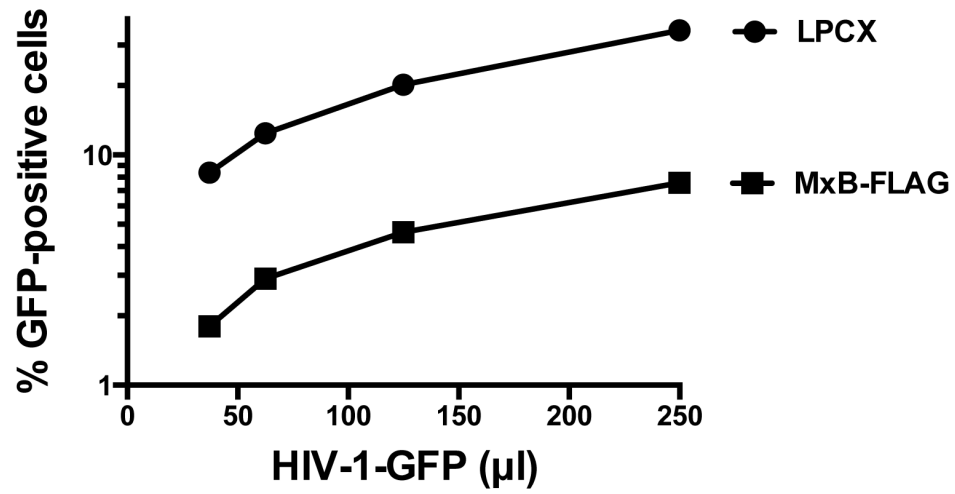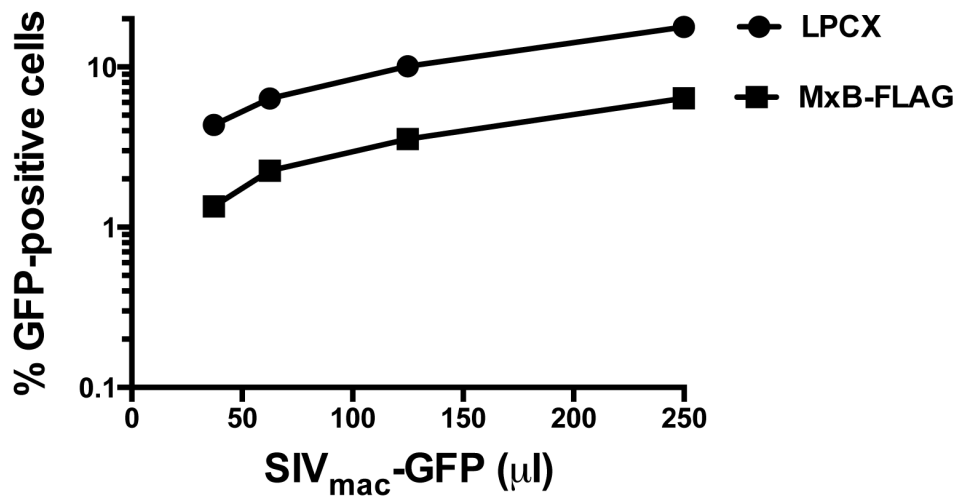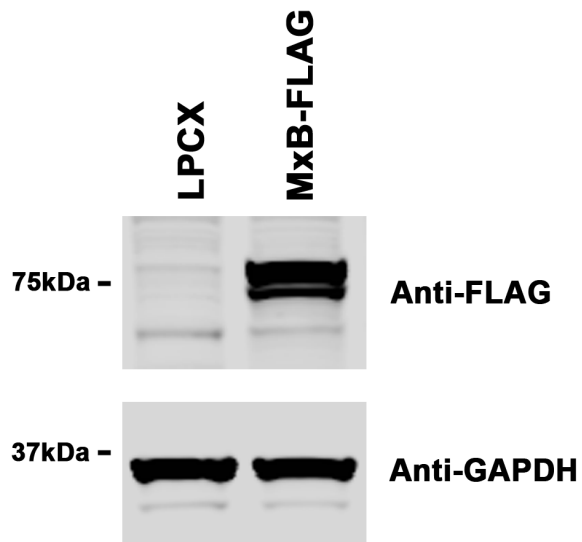

**Additional file 1**

**C**

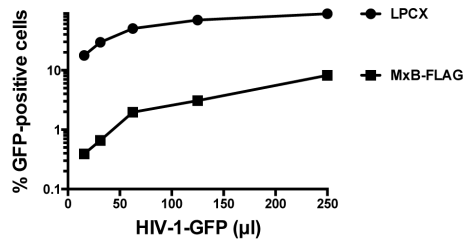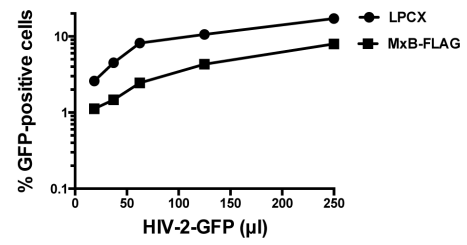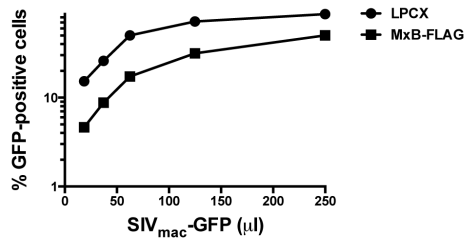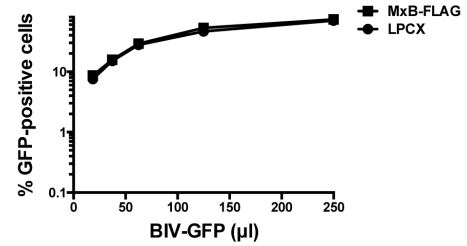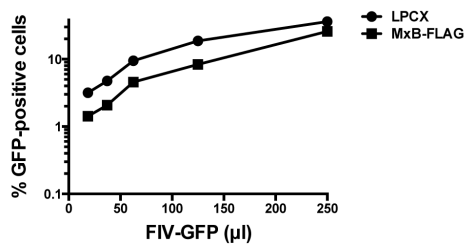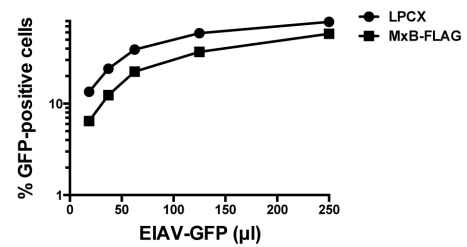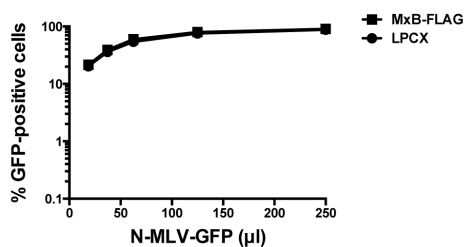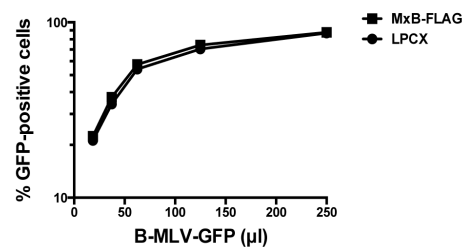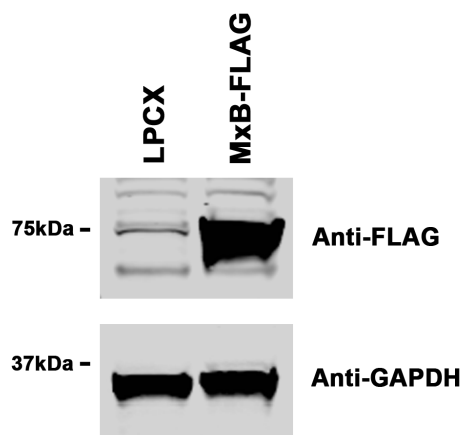

**Additional file 1**

**D**

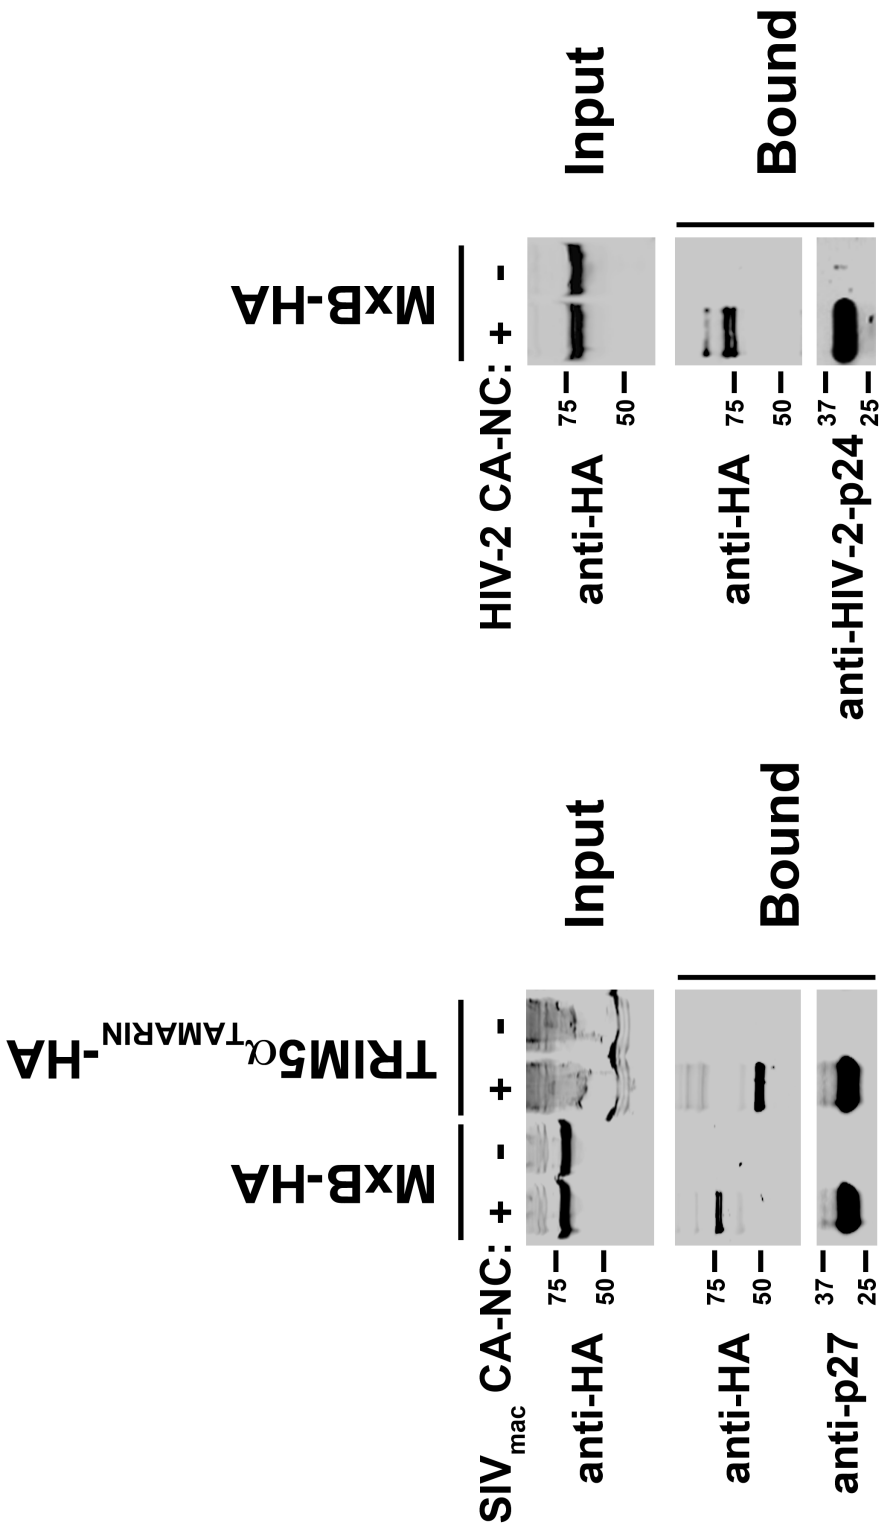

Supplement: 12977_2014_68_MOESM1_ESM.pdf [file 12977_2014_68_MOESM1_ESM.pdf]
